# Supplementary material for: Spontaneous perception of numerosity in pre-school children
Source: Proc Biol Sci. 2019 Jul 10;286(1906):20191245. doi: 10.1098/rspb.2019.1245 (PMC6650702; doi:10.1098/rspb.2019.1245)
Supplement: Math Skills [file rspb20191245supp5.xlsx]

## Sheet: Sheet1
SUBJECT ID	AGE (in years: 5.5 means 5y6mo)	AVERAGE OF PERCENTILES
580997	6.08	55.38
510953	6.3	72
851255	5.42	60.25
520956	6.19	65.38
640976	6.19
421008	6.05	87.63
280277	7.1	64.71
180408	6.74	22.57
741149	5.62	18.14
301022	6.06	84.63
361224	5.56	47.86
441286	5.34	75.5
451036	5.97	88.75
921079	4.96	55.25
591057	5.97	27.63
560925	6.33	84.38
520250	7.16	14.86
640916	6.41	40.25
131004	6.06	62.13
830417	6.71	45.57
380974	6.19	69.75
410375	6.82	14.71
571108	5.83	74.13
800282	7.08	31.43
330985	6.16	40.25
730991	6.15	61.5
301261	5.41	56.63
390083	7.63	35.43
901076	5.86	74.14
481236	5.42	43.5
921041	6.01	43.88
151040	5.96	46.25
140321	6.97	5
101267	5.34	37.88
481163	5.68	34.88
170155	7.44	13.43
841051	5.98	69.5
321272	5.33	48.88
660975	5.24	42
221031	5.99	76
981147	5.62	34.57
291151	5.66	46.38
201098	5.85	61.75
680928	5.37	78.13
561049	5.04
271214	5.59	42
101018	6.07	40.88
781023	6.06	58
790536	6.38	10.71
510980	6.08	35.29
771053	5.98
221089	5.88	58.63
421123	5.84	39.5
501039	5.92	59.71
261071	5.83	15.43
591037	6.02	72.25
971160	5.68	57.13
891115	5.81	46.25
701102	5.84	92.38
631109	5.82	34.5
799972	7.93	46.57
480295	7.05	34.29
220963	6.28	68.29
151007	6.1	37
840448	6.62	10.86
811219	5.52	78.5
371092	5.92
981205	5.56	68.5
480929	5.37	64
850476	6.55	23.71
230506	6.46	30.43
641147	5.67	39.25
881011	6.04	83.5
731051	5.89	44.57
761260	5.46	50.14
841257	5.42	85.38
830909	6.32	45.38
161115	5.71	37.86
110972	6.2	61.88
741262	5.46	76.57
830521	6.43	19
701108	5.73	23.71
911214	5.54	80.88
371003	5.17	48.38
870885	6.34	19.86
900354	6.88	23.86
550368	6.82	14.43
861136	5.7	20.25
161140	5.69	58.5
361057	5.97	87.38
770242	7.19	20.71
671256	5.42	78.75
900368	6.84	48.43
911141	5.64	55.86
551163	5.68	41.5
281096	5.81	41.38
750312	6.99	19.57
491027	6.05	22.63
340517	6.42	29.43
171162	5.63	18.13
361018	5.98	30.17
